# Supplementary material for: Ultra-sensitive fluorescence determination of chromium(vi) in aqueous solution based on selectively etching of protein-stabled gold nanoclusters
Source: Royal Society of Chemistry journal article supplement (doi:10.1039/c6ra23222a), 2016-01-01
Supplement: c6ra23222a1.pdf [file c6ra23222a1.pdf]

### Ultra-sensitive Fluorescence Determination of Chromium(VI) in Aqueous Solution Based on Selectively Etching of Protein-stabled Gold Nanoclusters

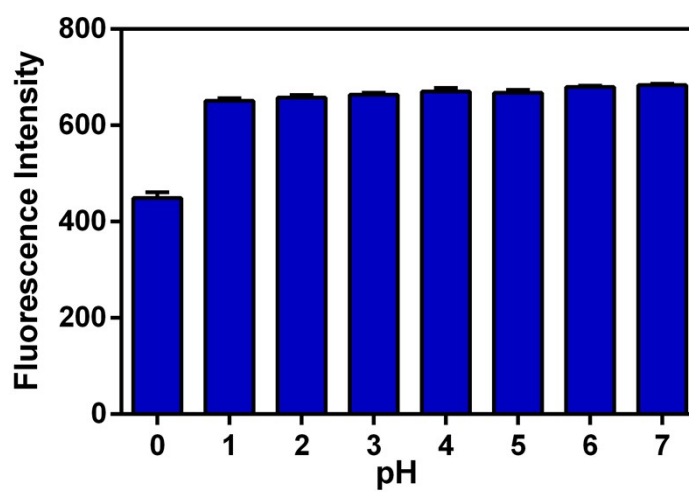

Figure S1 Influence of the pH on the fluorescence intensity of BSA-Au NCs

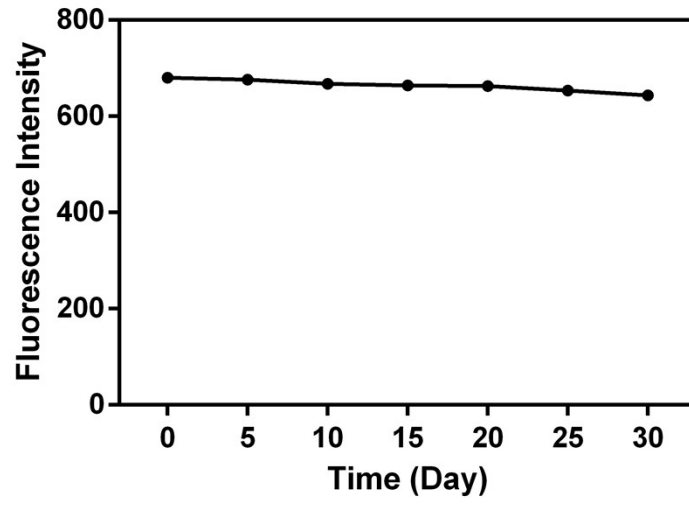

Figure S2 Effect of the time on the fluorescence stability BSA-Au NCs

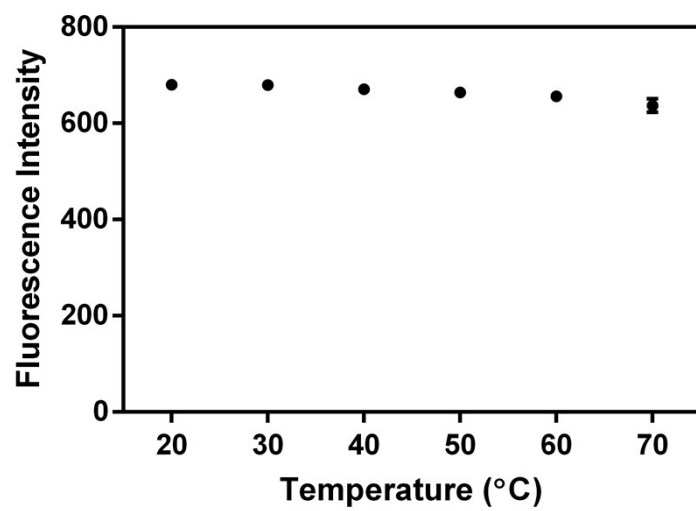

Figure S3 Effect of the temperature on the fluorescence stability BSA-Au NCs

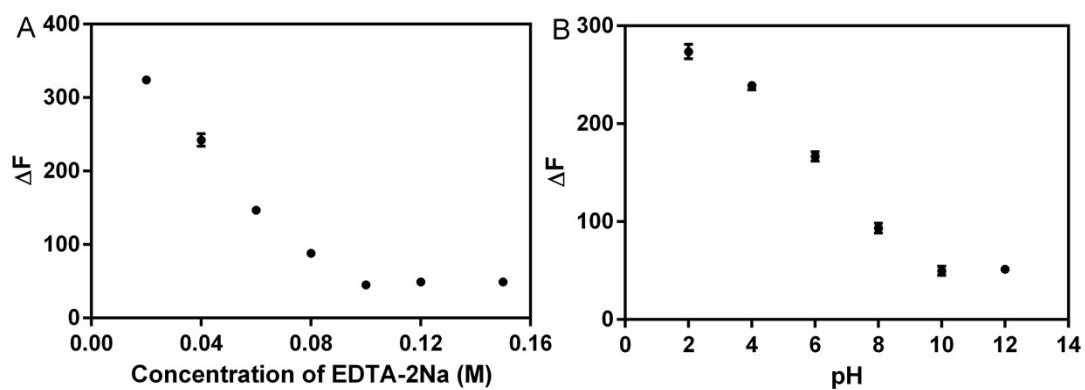

Figure S4 Effect of the concentration of EDTA-2Na (A) and pH (B) on the fluorescence quenching of BSA-Au NCs in the presence of  $Hg^{2+}$

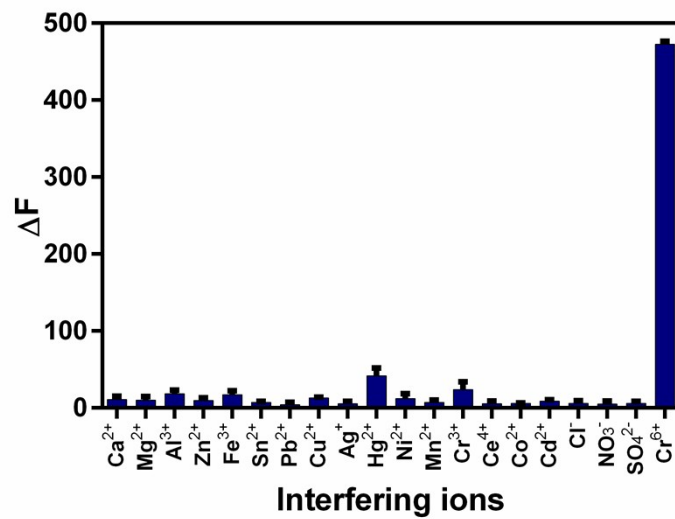

Figure S5 Relative sensitivity of different interfering ions to the proposed detection method after pretreatment with EDTA-2Na.

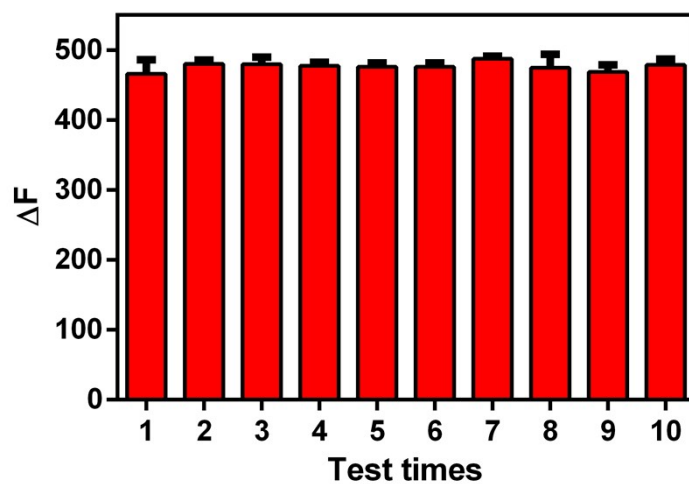

Figure S6 The Repeatability and reproducibility of the fluorescent sensor in analyzing Cr(VI) in 10 batches, each of which was measured with 5 repeated tests.
